# Supplementary material
Source: publisher figshare collection journal article supplement (https://frontiersin.figshare.com/ndownloader/files/10653727)
Supplement: Supplementary file [file 10653727]

**Bacterial strain and growth conditions.** *F. prausnitzii* A2–165 (DSM 17677) and *Roseburia intestinalis* (DSM14610T) were grown at 37°C in LYHBHI medium (Brain–heart infusion medium supplemented with 0.5% yeast extract (Difco) and 0.5% L-cysteine (Sigma-Aldrich)) supplemented with cellobiose (1 mg/ml; Sigma–Aldrich), maltose (1 mg/ml; Sigma), and cysteine (0.5 mg/ml; Sigma) in an anaerobic chamber. When necessary the bacteria was grown in a semi-defined medium composed by:  $\text{KH}_2\text{PO}_4$  (2.62 g/l),  $(\text{NH}_4)_2\text{SO}_4$  (2 g/l), NaCl (2 g/l),  $\text{CaCl}_2$  (15 mg/l),  $\text{MgCl}_2$  (150 mg/l)  $\text{MnCl}_2$  (15 mg/l),  $\text{FeCl}_3$  (4mg/ml), Vitamin B12 (5mg/l), Vitamin B (Thiamin) (1mg/l), Biotin (1 mg/l), PABA (1 mg/l), Folic acid (1 mg/l), Vitamin K (2 mg/l), 30 mM Acetate, cellobiose (1 mg/ml), maltose (1 mg/ml), glucose (1 mg/l), 2% yeast extract and cysteine (0.5 mg/ml) in an anaerobic chamber.

**Supernatant recovery and treatments.** The supernatant was recovered by centrifugation of an overnight culture and filter in 0.45  $\mu\text{m}$  filters (VWR). For enzymatic digestion a final concentration of 1mg/ml of protease from *Streptomyces griseus* (pronase), pepsin from porcine gastric mucosa, trypsin from bovine pancreas, lipase or alpha-Amylase (all from Sigma-Aldrich) were added to the supernatant or the medium. After 1H of incubation at 37 °C the enzymes were inactivated by an incubation of 30 min at 50 °C.

**Eukaryotic cell culture and experiments.** HeLa cells (ATCC CCL-2) were grown in Dulbecco's Modified Eagle's minimal essential medium (DMEM) (GibcoBRL) supplemented with 10% (w/v) fetal bovine serum (FBS, GibcoBRL), 2mM L-glutamine (GibcoBRL) and with penicillin G/streptomycin (5000 IU/ml, 5000  $\mu\text{g/ml}$ ) (Sigma-Aldrich). Cultures were incubated in 25  $\text{cm}^2$  tissue culture flasks (Nunc) at 37 °C in a 5% (v/v)  $\text{CO}_2$  atmosphere until confluence. For anti-inflammatory assays, 50000 cells per well were seeded in 24-well culture plates (Nunc) and cultivated, with a daily change of the culture medium during 6 days. The assays were performed seven days after seeding. Twenty-four hours before bacterial challenge, the culture medium was changed for a medium with 5% FBS. The bacterial supernatant at 20% , the control medium, PBS (GibcoBRL), the different chromatography fractions or the molecules to test were added and the cells were stimulated simultaneously with human recombinant TNF-alpha (5 mg/ml; Sigma–Aldrich) in DMEM medium with 5% FBS for 6 h. After incubation, cell supernatants were collected and frozen at 80°C with a cocktail of

protease inhibitors EDTA-free (Roche) until analysis. The IL-8 level was determined in cell supernatants using Human IL-8 ELISA kit (Biolegend) according to the manufacturer's recommendations.
